# Supplementary material for: Cinnamomum verum Bark Extract Mediated Green Synthesis of ZnO Nanoparticles and Their Antibacterial Potentiality
Source: PubMed Central journal article supplement (PMC7072335; doi:10.3390/biom10020336), 2020-02-19
Supplement: biomolecules-10-00336-s001.pdf [file biomolecules-10-00336-s001.pdf]

## Qualitative Report

File: C:\TurboMass\2019.PRO\Data\1-(19ES-1076).raw  
 Acquired: 02-Nov-19 03:30:54 AM  
 Description:  
 GC/MS Method: GC: METHOD-1.mth MS: METHOD-1.EXP  
 Sample ID: 1-(19ES-1076)

Printed: 06-Nov-19 10:39 AM

Page 1 of 1  
 Vial Number: 18

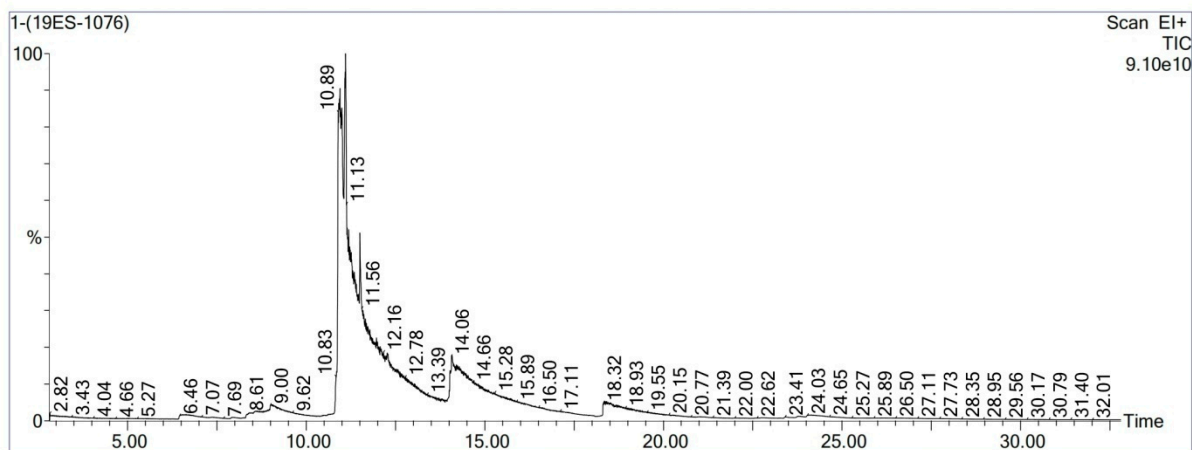

| #  | RT     | Scan | Height         | Area             | Area % | Norm % |
|----|--------|------|----------------|------------------|--------|--------|
| 1  | 6.540  | 748  | 1,081,022,336  | 478,499,616.0    | 0.799  | 2.77   |
| 2  | 9.016  | 1243 | 2,043,318,400  | 841,907,840.0    | 1.406  | 4.87   |
| 3  | 10.942 | 1628 | 79,621,521,408 | 11,840,221,184.0 | 19.778 | 68.50  |
| 4  | 11.097 | 1659 | 88,098,717,696 | 17,285,081,088.0 | 28.873 | 100.00 |
| 5  | 11.497 | 1739 | 43,221,598,208 | 14,119,109,632.0 | 23.585 | 81.68  |
| 6  | 12.267 | 1893 | 12,679,901,184 | 7,115,513,856.0  | 11.886 | 41.17  |
| 7  | 14.073 | 2254 | 11,469,706,240 | 1,490,959,488.0  | 2.491  | 8.63   |
| 8  | 14.203 | 2280 | 9,007,903,744  | 5,490,076,672.0  | 9.171  | 31.76  |
| 9  | 18.360 | 3111 | 3,332,050,432  | 215,566,736.0    | 0.360  | 1.25   |
| 10 | 18.410 | 3121 | 3,226,878,208  | 608,523,072.0    | 1.016  | 3.52   |
| 11 | 18.670 | 3173 | 1,850,669,568  | 379,985,376.0    | 0.635  | 2.20   |

Figure S1. Chromatogram of *C. verum* bark hexane extract analyzed on GC-MS.

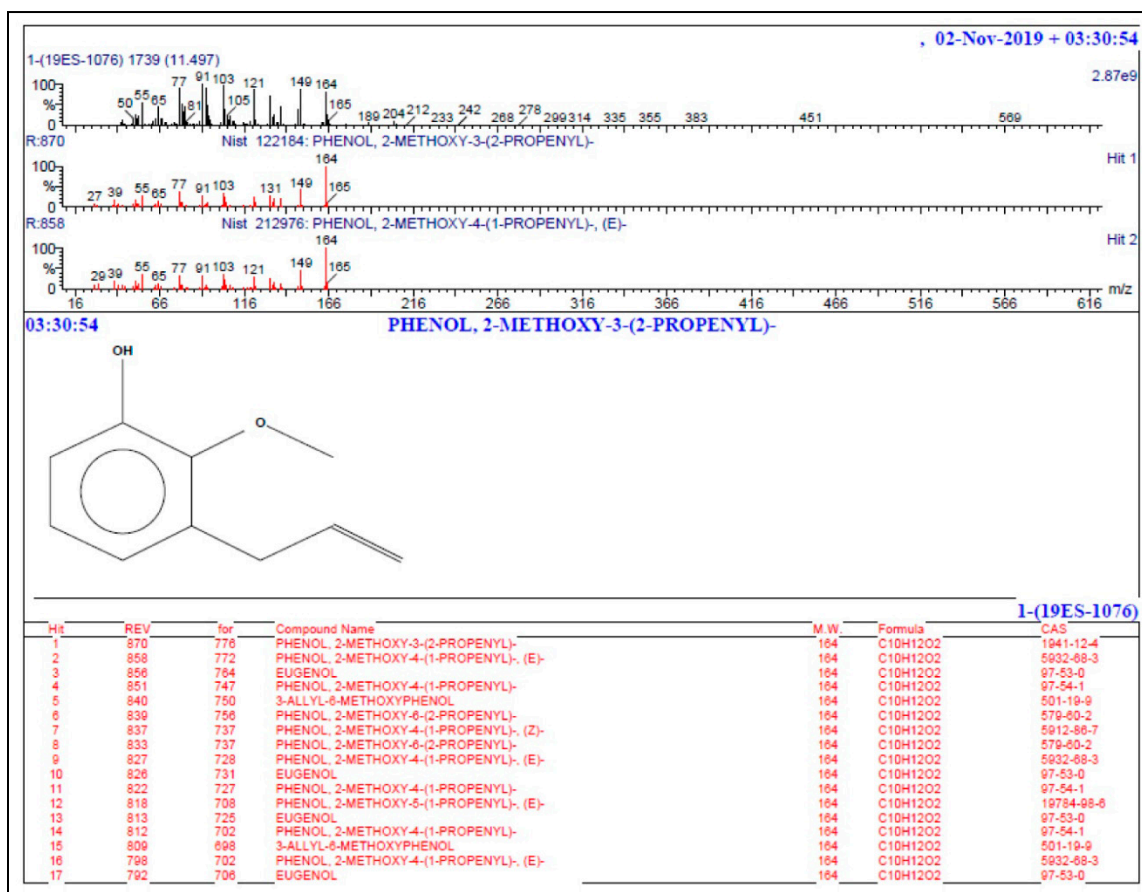

Figure S2. Retention time (RT) Library of *C. verum* bark hexane extract showing the eugenol content.

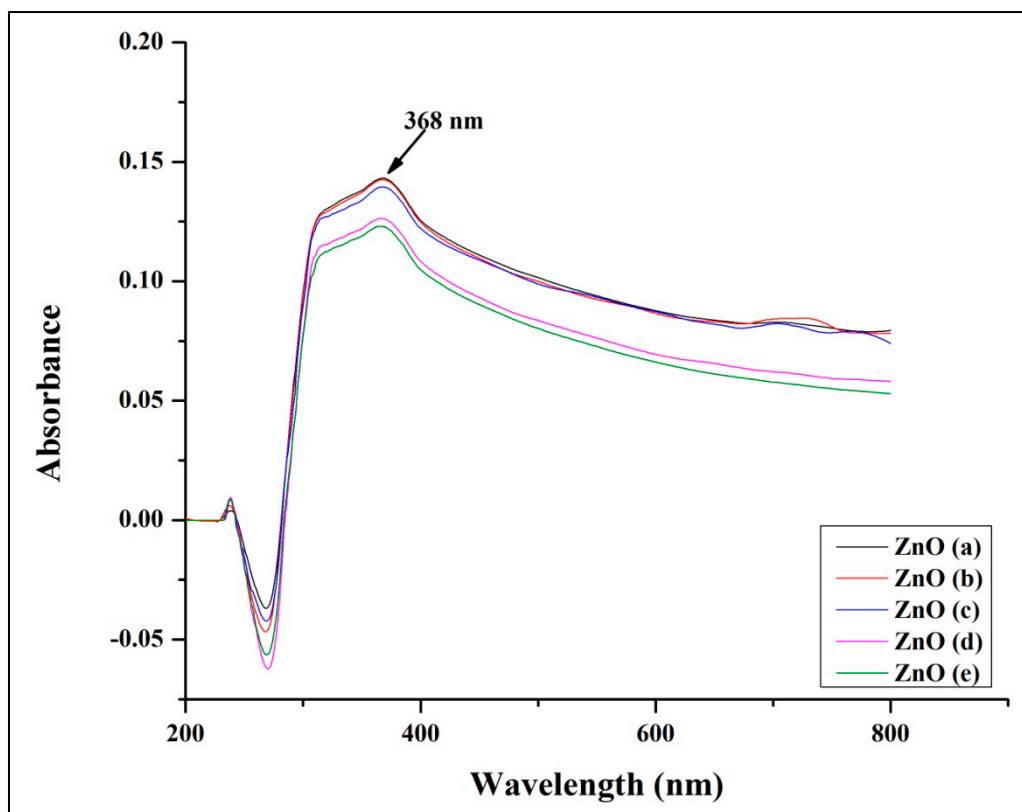

**Figure S3.** UV- visible spectra of various ZnO-NPs green synthesized using different concentration of *C. verum* hexane extract.

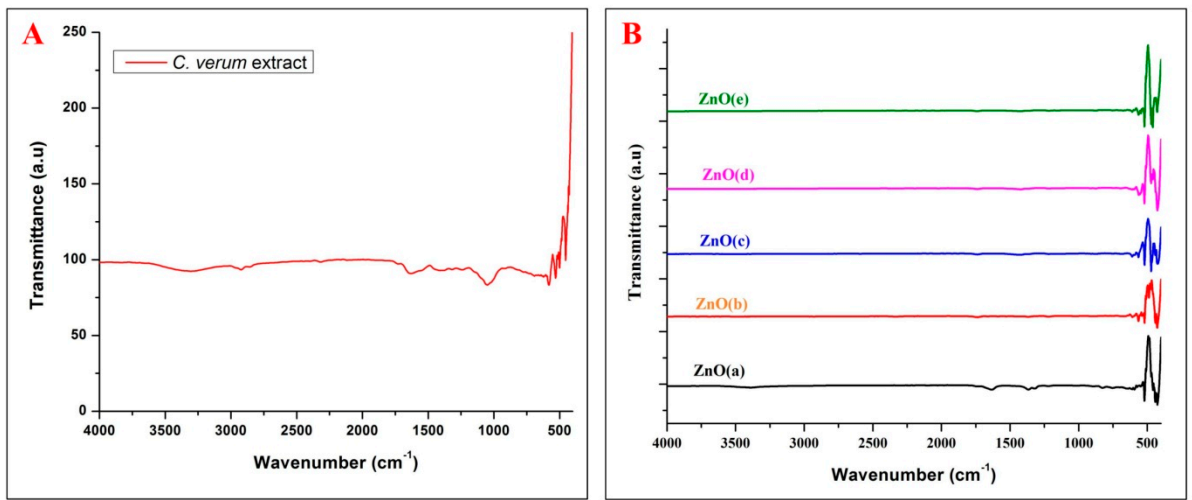

Figure S4. FT-IR Spectra of *C. verum* bark hexane extract (A) and its green synthesized ZnO-NPs (B)

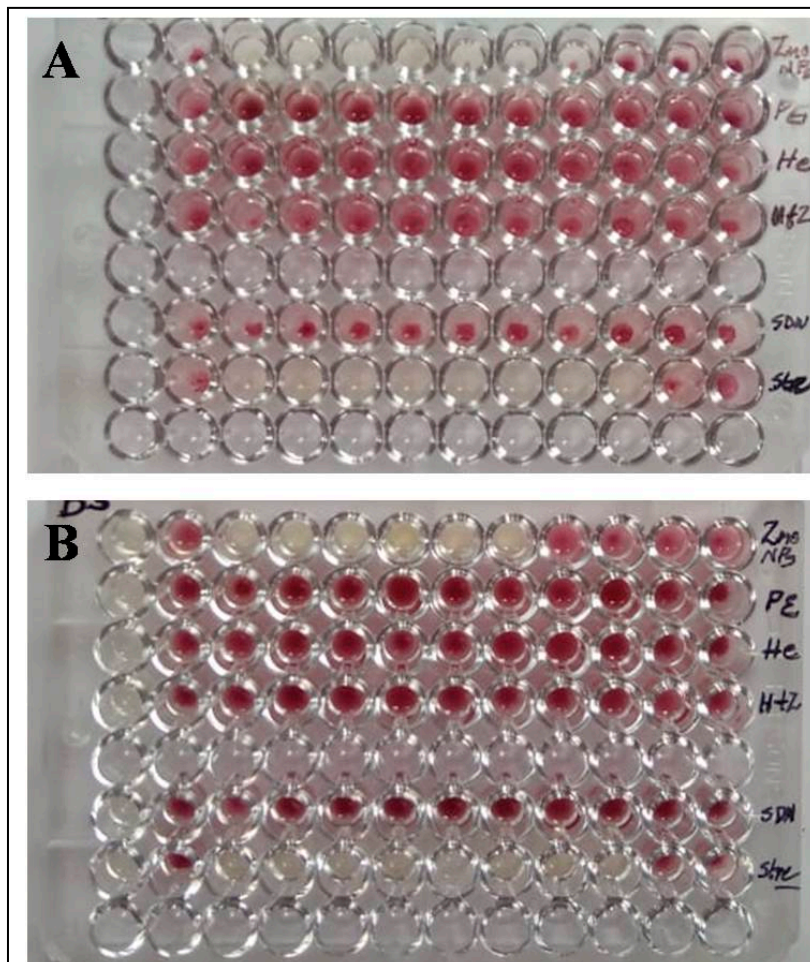

**Figure S5.** Minimum Inhibitory Concentration (MIC) of green synthesized ZnO-NPs from *C. verum* bark. hexane extract. A- *E. coli*; B- *S. aureus*. Row 1: ZnO-NPs; Row 2: Plant extract; Row 3: Hexane; Row 4: Hexane + Zinc nitrate hexahydrate; Row 5: Gap; Row 6: Sterile Distilled Water; Row 7: Streptomycin

| Well No.                                                                                                                                |                    |                                      |                                      |                                      |                                      |                                      |                                      |                                      |                                      |                                      |                                      |
|-----------------------------------------------------------------------------------------------------------------------------------------|--------------------|--------------------------------------|--------------------------------------|--------------------------------------|--------------------------------------|--------------------------------------|--------------------------------------|--------------------------------------|--------------------------------------|--------------------------------------|--------------------------------------|
| 1                                                                                                                                       | 2                  | 3                                    | 4                                    | 5                                    | 6                                    | 7                                    | 8                                    | 9                                    | 10                                   | 11                                   | 12                                   |
| Broth<br>(100 µl)                                                                                                                       | Broth              | Broth<br>+<br>Treatments<br>(100 µl) | Broth<br>+<br>Treatments<br>(100 µl) | Broth<br>+<br>Treatments<br>(100 µl) | Broth<br>+<br>Treatments<br>(100 µl) | Broth<br>+<br>Treatments<br>(100 µl) | Broth<br>+<br>Treatments<br>(100 µl) | Broth<br>+<br>Treatments<br>(100 µl) | Broth<br>+<br>Treatments<br>(100 µl) | Broth<br>+<br>Treatments<br>(100 µl) | Broth<br>+<br>Treatments<br>(100 µl) |
| -                                                                                                                                       | -                  | 2000 µg                              | 1000 µg                              | 500 µg                               | 250 µg                               | 125 µg                               | 62.5 µg                              | 31.25 µg                             | 15.625 µg                            | 7.8125 µg                            | 3.9062 µg                            |
|                                                                                                                                         | Culture<br>(10 µL) | Culture<br>(10 µL)                   | Culture<br>(10 µL)                   | Culture<br>(10 µL)                   | Culture<br>(10 µL)                   | Culture<br>(10 µL)                   | Culture<br>(10 µL)                   | Culture<br>(10 µL)                   | Culture<br>(10 µL)                   | Culture<br>(10 µL)                   | Culture<br>(10 µL)                   |
| Incubated for 24 h at 37 ± 2 °C                                                                                                         |                    |                                      |                                      |                                      |                                      |                                      |                                      |                                      |                                      |                                      |                                      |
| After Incubation Absorbance was read at 620 nm                                                                                          |                    |                                      |                                      |                                      |                                      |                                      |                                      |                                      |                                      |                                      |                                      |
| After taking absorbance each well is added with 10 µL TTC to visualize the growth of bacterium (Red color indicate the viable bacteria) |                    |                                      |                                      |                                      |                                      |                                      |                                      |                                      |                                      |                                      |                                      |
